# Supplementary material for: Sex differences in senescence: the role of intra-sexual competition in early adulthood
Source: PubMed Central journal article supplement (PMC4528560; doi:10.1098/rspb.2015.1086), 2015-07-22
Supplement: rspb20151086supp1.pdf [file rspb20151086supp1.pdf]

## 1 Electronic Supplementary Materials

---

2 *Electronic Supplementary Material S1*

| Int   | Sex | Month | SGS   | ALC   | Age   | Age <sup>2</sup> | Age*Sex | Age <sup>2</sup> *Sex | LYC | Sex*LYC | Age <sub>cat</sub> | Age <sub>cat</sub> *Sex | df | logLik | ΔAICc | AW   | RET |
|-------|-----|-------|-------|-------|-------|------------------|---------|-----------------------|-----|---------|--------------------|-------------------------|----|--------|-------|------|-----|
| 8.67  | ✓   | ✓     | -0.02 | -0.04 | 0.42  | -0.03            | ✓       |                       | ✓   |         |                    |                         | 23 | -1791  | 0.00  | 0.89 | ✓   |
| 8.67  | ✓   | ✓     | -0.02 | -0.04 | 0.42  | -0.03            | ✓       |                       | ✓   | ✓       |                    |                         | 24 | -1791  | 1.65  | 0.00 |     |
| 8.76  | ✓   | ✓     | -0.02 | -0.04 | 0.39  | -0.03            | ✓       | ✓                     | ✓   |         |                    |                         | 24 | -1791  | 2.01  | 0.00 |     |
| 8.76  | ✓   | ✓     | -0.02 | -0.04 | 0.39  | -0.03            | ✓       | ✓                     | ✓   | ✓       |                    |                         | 25 | -1791  | 3.65  | 0.00 |     |
| 8.43  | ✓   | ✓     | -0.02 | 0.00  | 0.39  | -0.03            | ✓       |                       |     |         |                    |                         | 22 | -1794  | 4.25  | 0.11 | ✓   |
| 8.48  | ✓   | ✓     | -0.02 | 0.00  | 0.38  | -0.03            | ✓       | ✓                     |     |         |                    |                         | 23 | -1794  | 6.30  | 0.00 |     |
| 9.00  | ✓   | ✓     | -0.02 | -0.04 | 0.35  | -0.03            |         |                       | ✓   |         |                    |                         | 22 | -1800  | 15.89 | 0.00 |     |
| 8.97  | ✓   | ✓     | -0.02 | -0.04 | 0.35  | -0.03            |         |                       | ✓   | ✓       |                    |                         | 23 | -1799  | 16.60 | 0.00 |     |
| 8.76  | ✓   | ✓     | -0.02 | 0.00  | 0.32  | -0.03            |         |                       |     |         |                    |                         | 21 | -1804  | 20.62 | 0.00 |     |
| 9.98  | ✓   | ✓     | -0.02 | -0.04 |       |                  |         |                       | ✓   |         | ✓                  | ✓                       | 36 | -1788  | 20.71 | 0.00 |     |
| 9.99  | ✓   | ✓     | -0.02 | -0.04 |       |                  |         |                       | ✓   | ✓       | ✓                  | ✓                       | 37 | -1788  | 22.71 | 0.00 |     |
| 9.98  | ✓   | ✓     | -0.02 | -0.04 |       |                  |         |                       | ✓   |         | ✓                  |                         | 28 | -1798  | 23.79 | 0.00 |     |
| 9.62  | ✓   | ✓     | -0.02 | 0.00  |       |                  |         |                       |     |         | ✓                  | ✓                       | 35 | -1791  | 23.84 | 0.00 |     |
| 9.96  | ✓   | ✓     | -0.02 | -0.03 |       |                  |         |                       | ✓   | ✓       | ✓                  |                         | 29 | -1797  | 24.65 | 0.00 |     |
| 9.60  | ✓   | ✓     | -0.02 | 0.00  |       |                  |         |                       |     |         | ✓                  |                         | 27 | -1801  | 27.21 | 0.00 |     |
| 10.72 | ✓   | ✓     | -0.02 | -0.03 | -0.12 |                  |         |                       | ✓   |         |                    |                         | 21 | -1808  | 30.06 | 0.00 |     |
| 10.72 | ✓   | ✓     | -0.02 | -0.03 | -0.12 |                  |         |                       | ✓   | ✓       |                    |                         | 22 | -1808  | 31.27 | 0.00 |     |
| 10.49 | ✓   | ✓     | -0.02 | 0.01  | -0.15 |                  |         |                       |     |         |                    |                         | 20 | -1812  | 34.90 | 0.00 |     |
| 10.68 | ✓   | ✓     | -0.02 | -0.12 |       |                  |         |                       | ✓   |         |                    |                         | 20 | -1824  | 58.50 | 0.00 |     |
| 10.68 | ✓   | ✓     | -0.02 | -0.12 |       |                  |         |                       | ✓   | ✓       |                    |                         | 21 | -1823  | 60.29 | 0.00 |     |
| 9.97  | ✓   | ✓     | -0.02 | -0.07 |       |                  |         |                       |     |         |                    |                         | 19 | -1844  | 97.08 | 0.00 |     |

3

4 **Table S1. The unabridged output table for model selection on the factors affecting body mass during the senescent period (≥ 5 years old).** The

5 abridged version is presented as Table 1 in the main manuscript. The final column indicates those models that were retained after the application

6 of the nesting rule (Richards *et al.* 2011; only these models appear in Table 1 in the main manuscript), whereby models are removed if they are  
7 more complex versions of nested (simpler) models that attracted stronger support. The grey area denotes the models included in the top set, ✓ =  
8 terms included in the model, \* = interaction between two terms, Int = intercept, SGS = Social Group Size, ALC = Age at Last Capture, Age = Age in  
9 days, Age<sub>cat</sub> = Age coded categorically (years), LYC = Last Year of Capture, df = degrees of freedom, AICc = Akaike's Information Criterion corrected  
10 for small sample size, ΔAICc = change in AICc relative to best supported model, AW = adjusted weight after removal of more complex models with  
11 less support.

12

13

14

15 *Electronic Supplementary Material S2*

16

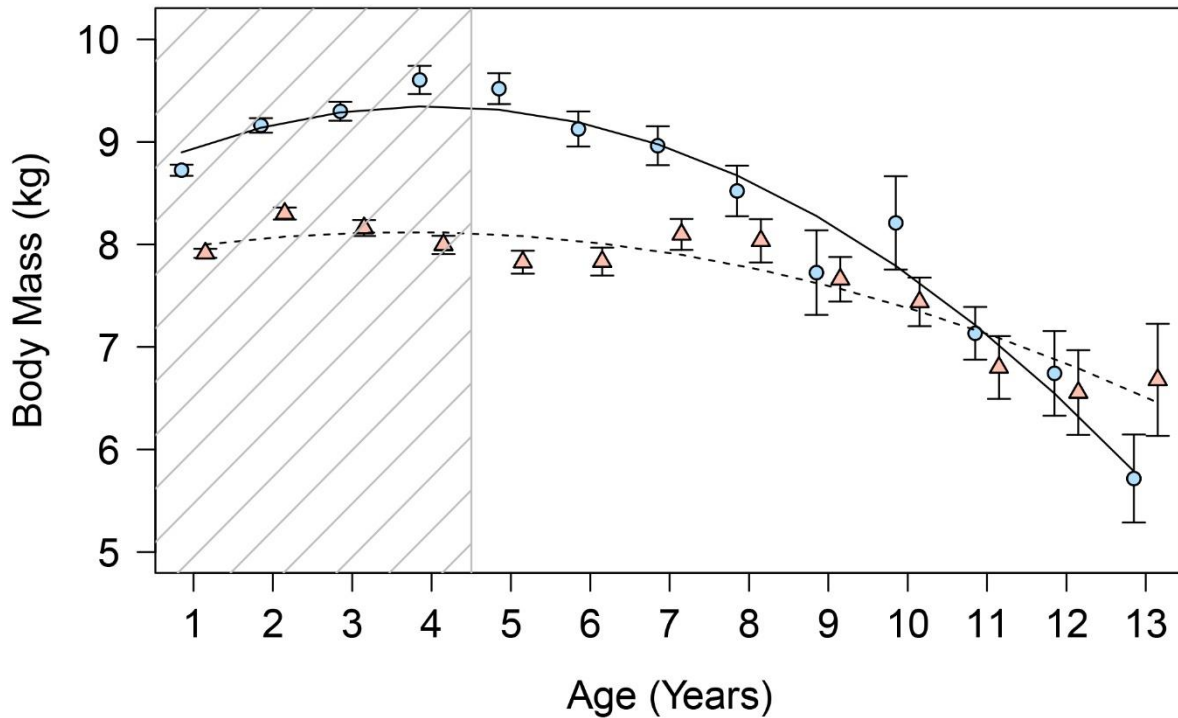

17

18 **Figure S1. Removal of individuals prior to peak body mass.** Observations prior to five years  
19 of age (grey hatched area) were removed from all body mass analyses to ensure that the  
20 age-related body mass dynamics prior to the attainment of peak body mass (which likely  
21 relate more to growth than senescence) did not influence our statistical conclusions regarding  
22 the age-related body mass dynamics in later life. The mean body masses and standard errors  
23 for males (circles) and females (triangles) for each year of age, for all individuals aged one year  
24 and over. The lines represent quadratic regression lines fitted to the means for males (solid  
25 line) and females (dashed line). The hatched grey area represents the age-classes excluded  
26 from the senescence analysis dataset.

27

28

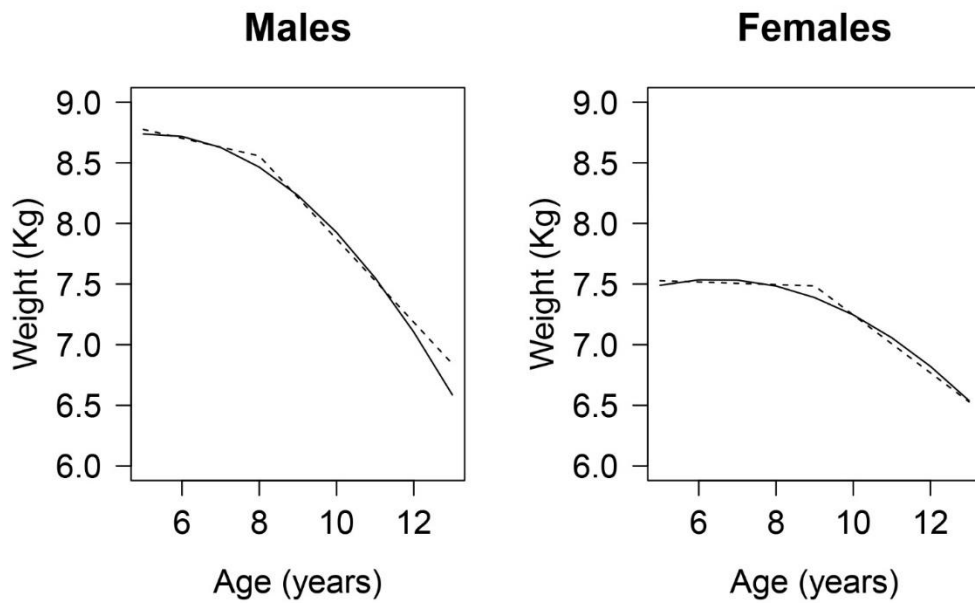

30

31 **Figure S2. Comparison of threshold and quadratic models of late-life body mass.**

32 We compared a range of single threshold (between 6 and 12 years inclusive) and double

33 threshold (first threshold 6-10 years inclusive; second threshold 8-12 years inclusive)

34 piecewise regression models to the best supported quadratic age function ( $\text{Age} \times \text{Sex} + \text{Age}^2$ ;

35 the top model in Table 1) for males and female respectively. The best supported threshold

36 model for males (single break point at 8 years; dashed line) received less support than the

37 quadratic age model ( $\Delta\text{AICc} = +0.84$  relative to the quadratic; solid line), whereas the best

38 supported threshold model for females (single break point at 9 years; dashed line) received

39 more support ( $\Delta\text{AICc} = -1.29$  relative to the quadratic; solid line).

40

42 **Assessing the effect of variation in recapture rates.** The simple local density metric used here  
 43 (based on the number of unique individuals caught within a 280m radius of a sett in each  
 44 calendar year) could be influenced by variation in recapture probabilities both through time  
 45 and between the sexes. To determine the extent to which this is the case we fitted a series of  
 46 Cormack-Jolly-Seber models to assess the evidence for *i)* year-year variation in the recapture  
 47 rate, *ii)* sex-specific recapture rate and *iii)* an interaction between year and sex (which could  
 48 lead to temporal bias our estimates of local sex ratio). Candidate models were assessed using  
 49 Akaike's Information Criteria (AIC) adjusted for overdispersion (QAIC), whereby 'better'  
 50 candidate models are indicated by lower AIC values. We tested for overdispersion of models  
 51 using the 'program RELEASE' method as implemented in the program MARK, and applied an  
 52 overdispersion estimate of 1.73 to all of the results. As in Graham *et al.* (2013) we applied  
 53 time invariant sex-specific survival parameter. We found support for year-year variation and  
 54 sex-specific recapture probabilities (males were more likely to be recaptured than females).  
 55 As adjusting the simple local density metrics to account for variation in recapture probabilities  
 56 yielded results which were qualitatively unchanged we only report the results from using  
 57 simple local density in the manuscript.

58

| <b>Recapture</b>  | <b>Survival</b> | <b>QAIC</b>   | <b><math>\Delta</math>QAIC</b> | <b>Num. of Parameters</b> | <b>QDeviance</b> |
|-------------------|-----------------|---------------|--------------------------------|---------------------------|------------------|
| <b>Year + Sex</b> | <b>Sex</b>      | <b>6850.7</b> | <b>0.00</b>                    | <b>28</b>                 | <b>1621.0</b>    |
| Sex               | Sex             | 6853.4        | 2.74                           | 4                         | 1672.0           |
| Year              | Sex             | 6854.1        | 3.40                           | 27                        | 1626.0           |
| -                 | Sex             | 6856.8        | 6.16                           | 3                         | 1677.0           |
| Year * Sex        | Sex             | 6891.9        | 41.20                          | 52                        | 1613.6           |

59 **Table S2. Summary of the model selection on factors influencing recapture probability.**

60 Where: Recapture = the terms included in estimation of recapture probability; Survival =  
 61 terms included in the estimation of survival probability; QAIC = Quasi-Akaike's Information  
 62 Criteria after over dispersion correction;  $\Delta$ QAIC = change in QAIC in comparison to the best

63 supported model; QDeviance = Quasi-deviance for each model. The model in bold denotes  
64 the best supported model.

65 1.

66 Graham J, Smith GC, Delahay RJ *et al.* (2013) Multi-state modelling reveals sex-dependent  
67 transmission, progression and severity of tuberculosis in wild badgers. *Epidemiology and*  
68 *Infection*, **141**, 1429–1436.

69

71 **Repeating analysis with Body condition.** In order to address the possibility that males show  
72 steeper late-life declines in body mass simply because they are larger individuals with more  
73 body mass to lose, we repeated our analysis from Section A in the main paper using a metric  
74 of standardised body condition, the Scaled Mass Index (SMI; Peig & Green 2010) in place of  
75 body mass. The SMI accounts for the sexual dimorphism in body size by scaling the body  
76 masses of all individuals (of differing body sizes) to the value expected for a single  
77 standardised body length, utilising the species-specific allometric scaling relationship  
78 between body length and body mass (Peig & Green 2010). Accordingly, the sex difference in  
79 mean body mass in European badgers in our data set (Males: 8.85kg, Females: 7.77kg) is no  
80 longer apparent in SMI (Males: 8.74kg, Females: 8.67kg) and, likewise, the higher variance in  
81 body mass among males due most likely to their larger size (Males: 2.95, Females: 2.55) is no  
82 longer apparent in SMI, indeed the reverse is true (Males: 2.04, Females: 2.72). Using SMI,  
83 body mass losses are therefore weighted against an individual's size, leaving a larger absolute  
84 change in body mass required in longer individuals than shorter individuals to bring about a  
85 comparable change in SMI. The SMI has been found to capture variation in fat and protein  
86 reserves more effectively than traditional residual body condition indices (Peig & Green 2009),  
87 and thus makes it an appropriate index for use in senescence studies. Body length  
88 measurements (the distance in centimetres from the tip of the nose to the distal point of the  
89 last caudal vertebra) were only available for badger captures from 1997 onwards, which  
90 substantially reduced the data set of captures of known-age individuals in late-life to just 536  
91 observations (a reduction of 57%) when using SMI as the response variable in place of body  
92 mass. The 'scaling component' was estimated through standardised major axis regression of  
93  $\ln(\text{body mass})$  on  $\ln(\text{body length})$  to be 4.5 (following Peig & Green 2010).



94

95 Repeating the analysis in Section A of the main manuscript using SMI as the response term in  
96 place of body mass confirmed support for a sex difference in the rate of standardised body  
97 condition (SMI) loss with age in late-life, whereby the SMIs of males declined at a faster rate  
98 than those of females (Figure S2a), again while controlling for terminal effects, selective  
99 disappearance effects, current social group size, month of capture and the random effects  
100 (Table S3). Consistent with the results of the body mass modelling presented in the main text,  
101 the SMI analysis suggests that SMI decreases with increasing age at last capture (a selective  
102 disappearance effect; Figure S2b) and in the last year of capture (a terminal effect; Figure S2c).  
103 Whilst the best-supported model contained the age\*sex interaction, two models within the  
104  $\Delta AICc < 6$  top model set did not (Table S3), which likely reflects the marked reduction in the  
105 available sample size when using SMI in place of body mass .

106 1.

107 Peig, J. & Green, A.J. (2009). New perspectives for estimating body condition from  
108 mass/length data: the scaled mass index as an alternative method. *Oikos*, 118, 1883–1891.

109 2.

110 Peig, J. & Green, A.J. (2010). The paradigm of body condition: a critical reappraisal of current  
111 methods based on mass and length. *Funct. Ecol.*, 24, 1323–1332.

112 3.

113 Richards, S., Whittingham, M. & Stephens, P. (2011). Model selection and model averaging in  
114 behavioural ecology: the utility of the IT-AIC framework. *Behav. Ecol. Sociobiol.*, 65, 77–89.

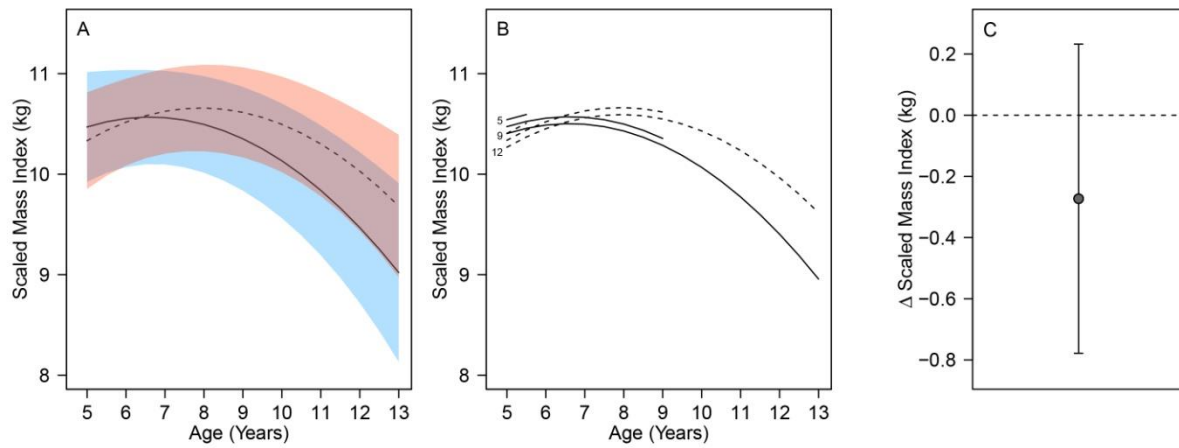

115

116 **Figure S3. Model output from body condition analyses.** (a) presents predicted SMI of males  
 117 (blue/solid line) and females (red/dashed line) with advancing age from the top model in Table  
 118 S3. Predictions were made for badgers outside of their year of last capture, with ALC and social  
 119 group size set to their mean values (9.2 and 12 respectively), and month set to July. The  
 120 shaded areas represent 95% confidence intervals based on fixed effects uncertainty. (b)  
 121 presents the effect of age at last capture (ALC) for males (solid lines) and females (dashed  
 122 lines) for individuals last caught at ages 5, 9 and 12 years. (c) presents the terminal effect; the  
 123 predicted change in SMI of individuals in their last year of capture (whiskers present the 95%  
 124 confidence interval).

| Int   | Sex | Month | SGS   | ALC   | Age   | Age <sup>2</sup> | Age*Sex | Age <sup>2</sup> *Sex | LYC | Sex*LYC | df | ΔAICc | AW   | RET |
|-------|-----|-------|-------|-------|-------|------------------|---------|-----------------------|-----|---------|----|-------|------|-----|
| 8.94  | ✓   | ✓     | -0.08 | -0.02 | 0.60  | -0.04            | ✓       |                       | ✓   |         | 21 | 0.00  | 0.55 | ✓   |
| 8.92  | ✓   | ✓     | -0.08 | -0.02 | 0.61  | -0.04            | ✓       |                       | ✓   | ✓       | 22 | 0.78  | 0.00 |     |
| 9.15  | ✓   | ✓     | -0.08 | -0.03 | 0.58  | -0.04            |         |                       | ✓   |         | 20 | 1.19  | 0.30 | ✓   |
| 9.11  | ✓   | ✓     | -0.08 | -0.02 | 0.56  | -0.04            | ✓       | ✓                     | ✓   |         | 22 | 2.01  | 0.00 |     |
| 9.12  | ✓   | ✓     | -0.08 | -0.02 | 0.55  | -0.03            | ✓       | ✓                     | ✓   | ✓       | 23 | 2.72  | 0.00 |     |
| 9.17  | ✓   | ✓     | -0.08 | -0.03 | 0.58  | -0.04            |         |                       | ✓   | ✓       | 21 | 3.13  | 0.00 |     |
| 8.48  | ✓   | ✓     | -0.08 | 0.04  | 0.58  | -0.04            | ✓       |                       |     |         | 20 | 3.22  | 0.11 | ✓   |
| 8.66  | ✓   | ✓     | -0.08 | 0.04  | 0.54  | -0.04            | ✓       | ✓                     |     |         | 21 | 5.21  | 0.00 |     |
| 8.68  | ✓   | ✓     | -0.08 | 0.04  | 0.56  | -0.04            |         |                       |     |         | 19 | 5.26  | 0.04 | ✓   |
| 11.74 | ✓   | ✓     | -0.08 | -0.08 |       |                  |         |                       | ✓   |         | 18 | 13.52 | 0.00 |     |
| 11.71 | ✓   | ✓     | -0.08 | -0.03 | -0.06 |                  |         |                       | ✓   |         | 19 | 13.71 | 0.00 |     |
| 11.75 | ✓   | ✓     | -0.08 | -0.08 |       |                  |         |                       | ✓   | ✓       | 19 | 15.13 | 0.00 |     |
| 11.71 | ✓   | ✓     | -0.08 | -0.04 | -0.05 |                  |         |                       | ✓   | ✓       | 20 | 15.53 | 0.00 |     |
| 11.32 | ✓   | ✓     | -0.08 | 0.04  | -0.12 |                  |         |                       |     |         | 18 | 19.09 | 0.00 |     |
| 11.09 | ✓   | ✓     | -0.07 | -0.05 |       |                  |         |                       |     |         | 17 | 28.88 | 0.00 |     |

125 **Table S3. Model selection on the factors affecting body condition (SMI) during the senescent period ( $\geq 5$  years old).** The final column indicates  
126 those models that were retained after the application of the nesting rule (Richards *et al.* 2011), whereby models are removed if they are more  
127 complex versions of nested (simpler) models that attracted stronger support. The grey area denotes the models included in the top set, ✓ =  
128 categorical terms included in the model, \* = interaction between two terms, Int = intercept, SGS = Social Group Size, ALC = Age at Last Capture, Age  
129 = Age in days, LYC = Last Year of Capture, df = degrees of freedom, AICc = Akaike's Information Criterion corrected for small sample size, ΔAICc =  
130 change in AICc relative to best supported model, AW = adjusted weight after removal of more complex models with less support.

131

133 **The non-sex-specific downstream effect of total density in early adulthood on late life**  
134 **declines in body mass.** Individuals experiencing high early adulthood population density show  
135 faster late life declines in body mass (Figure S4), which concurs with the density effect found  
136 in (Nussey *et al.* 2007). Extending our statistical analyses suggests that this downstream effect  
137 of total density is acting in addition to the sex-specific downstream effect of male density, as  
138 the inclusion of *both* downstream effects in a single model (a model that Table 2 does not  
139 test: Body mass  $\sim$  Month + ALC + Social Group Size + LYC + **Age\*Sex\*Early Adulthood Male**  
140 **Density + Age\*Early Adulthood Total Density** + Age<sup>2</sup> + 1 | ID + 1 | Year + 1 | Social Group) yielded  
141 a model with stronger support than any of our existing models (i.e. a better AIC than the best  
142 supported model in Table 2;  $\Delta$ AIC= -2.96; adjusted model weight 0.71) with parameter  
143 estimates for the downstream effects of early life male density and early life total density  
144 qualitatively unchanged.

145

146 1. Nussey, D.H., Kruuk, L.E.B., Morris, A. & Clutton-Brock, T.H. (2007) Environmental  
147 conditions in early life influence ageing rates in a wild population of red deer. *Curr. Biol.*, 17,  
148 R1000–R1001.

149

150

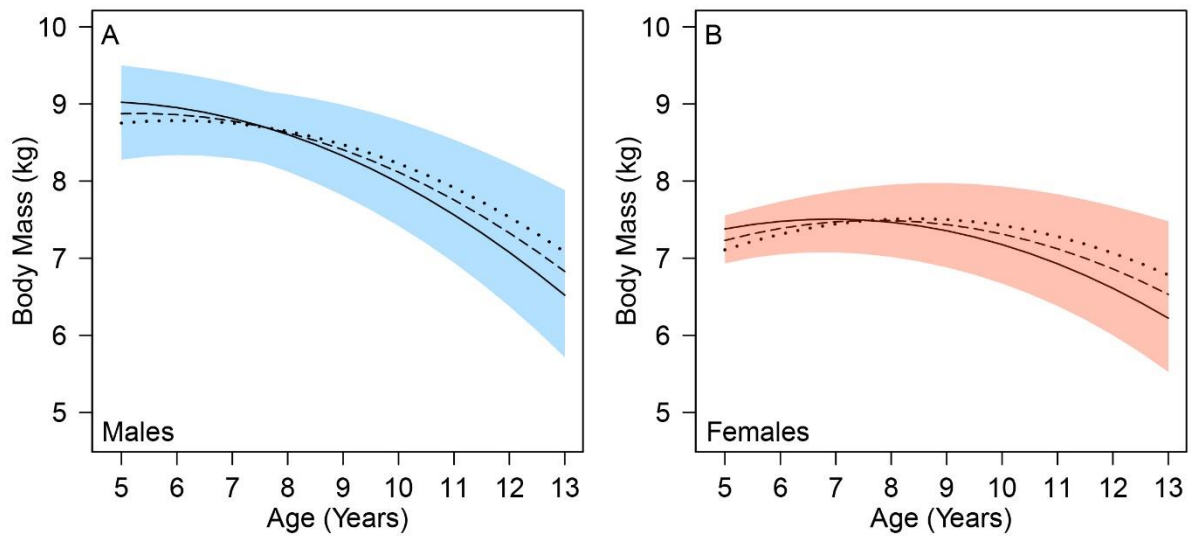

151

152

153 **Figure S4. The downstream effect of early adulthood total density on the late-life body**

154 **masses of (a) males and (b) females** (though this was *not* a sex-specific effect). The panels

155 present the predicted relationship between age, the total adult density experienced in early

156 adulthood and body mass, from the second ranked model in Table 2. Dotted lines = low total

157 density (12.5 individuals per 24.5 hectares); dashed lines = average total density (16.2); solid

158 lines = high total density (22.2). Predictions represent badgers outside of their year of last

159 capture, with age at last capture and social group size set to their mean values, and month set

160 to July. The upper and lower limits of each shaded area represent 95% confidence interval

161 estimates based on fixed effects uncertainty.

162

164

| Base model +                 |                          |                          | df | $\Delta$ AICc | AW   |
|------------------------------|--------------------------|--------------------------|----|---------------|------|
| Age <sup>2</sup> *Sex* _____ | Age <sup>2</sup> * _____ | Age <sup>2</sup> + _____ |    |               |      |
| EA Male Density              |                          |                          | 27 | 0.00          | 0.68 |
|                              |                          | EA Male Density          | 24 | 2.19          | 0.23 |
|                              | EA Male Density          |                          | 25 | 2.66          | -    |
|                              |                          | Current Male Density     | 24 | 4.03          | 0.09 |
|                              | Current Male Density     |                          | 25 | 5.33          | -    |
| Current Male Density         |                          |                          | 27 | 7.78          | -    |

165 **Table S4. Model selection directly comparing the explanatory power of interactions**

166 **between age and male density experienced in early adulthood ('EA Male Density') or male**

167 **density experienced during the senescent period ('Current Male Density').** The grey area

168 denotes the models included in the top model set. The first three columns represent terms in

169 addition to the base model (see below), where: \* = interactions between terms, + = additive

170 terms, df = degrees of freedom, AW = adjusted weight after removal of more complex models

171 with less support. The base model was defined as: Body mass ~ Month + ALC + Social Group

172 Size + LYC + Age\*Sex + Age<sup>2</sup> + (1|ID) + (1|Year) + (1|Social Group); the top model from Table

173 1.
